# Supplementary material
Source: PubMed Central journal article supplement (PMC3528696)
Supplement: epi-7-1413-s01.pdf [file epi-7-1413-s01.pdf]

## **Supplemental Material to:**

**Natalie E. Simpson, Volodymyr P. Tryndyak, Marta Pogribna, Frederick A. Beland and Igor P. Pogribny**

**Modifying metabolically sensitive histone marks by inhibiting glutamine metabolism affects gene expression and alters cancer cell phenotype**

**Epigenetics 2012; 7(12)**

**<http://dx.doi.org/10.4161/epi.22713>**

**<http://www.landesbioscience.com/journals/epigenetics/article/22713>**

**Supplementary Table 1.** Gene expression in MDA-MB-231 cells treated with 968 compound (fold change < 2.0).

| #  | GeneBank  | Symbol  | Description                                                                         | 968 vs control |         |
|----|-----------|---------|-------------------------------------------------------------------------------------|----------------|---------|
|    |           |         |                                                                                     | Fold change    | p value |
| 1  | NM_005157 | ABL1    | C-abl oncogene 1, non-receptor tyrosine kinase                                      | 1.11           | 0.816   |
| 2  | NM_000038 | APC     | Adenomatous polyposis coli                                                          | 1.33           | 0.444   |
| 3  | NM_000051 | ATM     | Ataxia telangiectasia mutated                                                       | 1.28           | 0.475   |
| 4  | NM_004324 | BAX     | BCL2-associated X protein                                                           | 1.15           | 0.691   |
| 5  | NM_004327 | BCR     | Breakpoint cluster region                                                           | 1.53           | 0.312   |
| 6  | NM_001228 | CASP8   | Caspase 8, apoptosis-related cysteine peptidase                                     | 1.29           | 0.040   |
| 7  | NM_000075 | CDK4    | Cyclin-dependent kinase 4                                                           | 1.07           | 0.655   |
| 8  | NM_000389 | CDKN1A  | Cyclin-dependent kinase inhibitor 1A (p21, Cip1)                                    | 1.35           | 0.041   |
| 9  | NM_001904 | CTNNB1  | Catenin (cadherin-associated protein), beta 1, 88kDa                                | 1.43           | 0.012   |
| 10 | NM_001963 | EGF     | Epidermal growth factor                                                             | 1.37           | 0.185   |
| 11 | NM_005229 | ELK1    | ELK1, member of ETS oncogene family                                                 | 1.31           | 0.001   |
| 12 | NM_002012 | FHIT    | Fragile histidine triad gene                                                        | 1.93           | 0.002   |
| 13 | NM_005252 | FOS     | FBJ murine osteosarcoma viral oncogene homolog                                      | 1.47           | 0.164   |
| 14 | NM_012183 | FOXD3   | Forkhead box D3                                                                     | 1.91           | 0.237   |
| 15 | NM_005343 | HRAS    | V-Ha-ras Harvey rat sarcoma viral oncogene homolog                                  | 1.01           | 0.866   |
| 16 | NM_000876 | IGF2R   | Insulin-like growth factor 2 receptor                                               | 1.35           | 0.050   |
| 17 | NM_004972 | JAK2    | Janus kinase 2                                                                      | 1.15           | 0.252   |
| 18 | NM_002229 | JUNB    | Jun B proto-oncogene                                                                | 1.57           | 0.311   |
| 19 | NM_005354 | JUND    | Jun D proto-oncogene                                                                | 1.22           | 0.546   |
| 20 | NM_004985 | KRAS    | V-Ki-ras2 Kirsten rat sarcoma viral oncogene homolog                                | -1.10          | 0.565   |
| 21 | NM_021960 | MCL1    | Myeloid cell leukemia sequence 1 (BCL2-related)                                     | 1.12           | 0.587   |
| 22 | NM_002392 | MDM2    | Mdm2 p53 binding protein homolog (mouse)                                            | -1.12          | 0.175   |
| 23 | NM_000244 | MEN1    | Multiple endocrine neoplasia I                                                      | 1.14           | 0.503   |
| 24 | NM_000245 | MET     | Met proto-oncogene (hepatocyte growth factor receptor)                              | -1.00          | 0.984   |
| 25 | NM_002412 | MGMT    | O-6-methylguanine-DNA methyltransferase                                             | 1.82           | 0.004   |
| 26 | NM_000249 | MLH1    | MutL homolog 1, colon cancer, nonpolyposis type 2 (E. coli)                         | -1.37          | 0.070   |
| 27 | NM_000267 | NF1     | Neurofibromin 1                                                                     | 1.11           | 0.265   |
| 28 | NM_003998 | NFKB1   | Nuclear factor of kappa light polypeptide gene enhancer in B-cells 1                | 1.02           | 0.897   |
| 29 | NM_020529 | NFKBIA  | Nuclear factor of kappa light polypeptide gene enhancer in B-cells inhibitor, alpha | 1.80           | 0.033   |
| 30 | NM_002524 | NRAS    | Neuroblastoma RAS viral (v-ras) oncogene homolog                                    | -1.14          | 0.158   |
| 31 | NM_002645 | PIK3C2A | Phosphoinositide-3-kinase, class 2, alpha polypeptide                               | 1.07           | 0.291   |
| 32 | NM_006218 | PIK3CA  | Phosphoinositide-3-kinase, catalytic, alpha polypeptide                             | 1.08           | 0.444   |
| 33 | NM_033238 | PML     | Promyelocytic leukemia                                                              | 1.15           | 0.453   |
| 34 | NM_002737 | PRKCA   | Protein kinase C, alpha                                                             | 1.22           | 0.204   |

|    |           |              |                                                                                  |       |       |
|----|-----------|--------------|----------------------------------------------------------------------------------|-------|-------|
| 35 | NM_002880 | RAF1         | V-raf-1 murine leukemia viral oncogene homolog 1                                 | 1.05  | 0.344 |
| 36 | NM_000964 | RARA         | Retinoic acid receptor, alpha                                                    | 1.76  | 0.009 |
| 37 | NM_002908 | REL          | V-rel reticuloendotheliosis viral oncogene homolog (avian)                       | 1.15  | 0.094 |
| 38 | NM_001754 | RUNX1        | Runt-related transcription factor 1                                              | 1.31  | 0.164 |
| 39 | NM_002961 | S100A4       | S100 calcium binding protein A4                                                  | 1.88  | 0.003 |
| 40 | NM_014631 | SH3PXD2<br>A | SH3 and PX domains 2A                                                            | 1.31  | 0.431 |
| 41 | NM_005359 | SMAD4        | SMAD family member 4                                                             | -1.02 | 0.768 |
| 42 | NM_005417 | SRC          | V-src sarcoma (Schmidt-Ruppin A-2) viral oncogene homolog (avian)                | 1.43  | 0.280 |
| 43 | NM_003150 | STAT3        | Signal transducer and activator of transcription 3 (acute-phase response factor) | 1.15  | 0.170 |
| 44 | NM_000455 | STK11        | Serine/threonine kinase 11                                                       | 1.16  | 0.898 |
| 45 | NM_000660 | TGFB1        | Transforming growth factor, beta 1                                               | 1.86  | 0.018 |
| 46 | NM_000594 | TNF          | Tumor necrosis factor                                                            | 1.18  | 0.277 |
| 47 | NM_000546 | TP53         | Tumor protein p53                                                                | -1.15 | 0.170 |
| 48 | NM_000368 | TSC1         | Tuberous sclerosis 1                                                             | 1.43  | 0.002 |
| 49 | NM_000551 | VHL          | Von Hippel-Lindau tumor suppressor                                               | 1.62  | 0.015 |
| 50 | NM_016373 | WWOX         | WW domain containing oxidoreductase                                              | 1.29  | 0.089 |
| 51 | NM_006297 | XRCC1        | X-ray repair complementing defective repair in Chinese hamster cells 1           | 1.53  | 0.009 |
| 52 | NM_014943 | ZHX2         | Zinc fingers and homeoboxes 2                                                    | 1.50  | 0.011 |
